# Supplementary material for: Patient-Completed Caprini Risk Score for Venous Thromboembolism Risk Assessment: Developed and Validated from 1,017 Medical and Surgical Patients
Source: PubMed Central journal article supplement (PMC9303073; doi:10.1055/s-0042-1749170), 2022-07-21
Supplement: 10-1055-s-0042-1749170-s210078.pdf [file 10-1055-s-0042-1749170-s210078.pdf]

## 您存在深静脉血栓形成 (DVT) 的风险吗? (患者版)

深静脉血栓形成(DVT)是指在您下部的深静脉内有血栓形成,只有您的医生可以评估您深静脉血栓形成的风险。通过回顾您的个人病史和目前的健康状况,有助于判断您是否有罹患这种疾病的风险。为了您与您爱的人,请花费一定时间完成这个表格。之后务必与您的医生交流,了解您的深静脉血栓形成风险情况与预防措施。

### 1. 请选择您的**年龄**:

0-40 岁 (0 分)  41-60 岁 (1 分)  61-74 岁 (2 分)   $\geq 75$  岁 (3 分)

分数:

### 2. 每一条适用于您的情况加 **1 分**:

- 在过去的一个月里,我**接受了全身/局部麻醉手术**,手术时间持续 45 分钟以上。
- 在过去的一个月里,我有过**下肢静脉曲张**(或目前仍有)症状。
- 在过去的一个月里,我有过**下肢肿胀**(或目前仍有)症状。
- 在过去的一个月里,我有过**心脏发病作**。
- 在过去的一个月里,我有过**严重的感染**,并住院治疗,例如肺炎、蜂窝织炎等,或目前仍有上述情况。
- 我曾经有过**炎症性肠病史**(主要包括克罗恩病或溃疡性结肠炎)。
- 我曾经有过(或目前仍患者有)**心力衰竭**。
- 我有**慢性肺病病史**(例如慢性阻塞性肺疾病、肺气肿、慢性气管炎),但不包括哮喘。

分数:

### 3. 以下选项仅对**女性**有效,对您适用的每种情况加 **1 分**:

- 我近 1 个月内正在使用避孕措施(口服避孕药,皮下埋植剂,激素贴片,含激素的宫内节育器,长效避孕药)或激素替代治疗。不包括安全套或屏障避孕方法。
- 我目前正在怀孕或在 1 个月内有生产史。
- 我曾经有过不明原因的死胎史,3 次以上的自然流产史、子痫前期合并早产,或小于胎龄儿(低出生体重儿)。

分数:

### 4. 每条适用于您的情况加 **2 分**:

- 在过去的 6 个月里,我的医生告诉我患有癌症、白血病、淋巴瘤或黑色素瘤。
- 在过去的 1 个月里,我曾经有过下肢的石膏固定,使我不能弯曲和/或正常行走。
- 在过去的 1 个月里,医生或护士曾经在我的颈部或胸部放置了 PICC 穿刺针、输液港或中央静脉置管,目的是进行输血或用药(或者目前仍有上述情况)。

分数:

### 5. 每条适用于您的情况加 **3 分**:

- 我的下肢、上肢、腹部或肺部有静脉血栓病史。**(脑梗塞、心肌梗死除外)**
- 我的亲属(父母、祖父母、阿姨、叔叔、兄弟姐妹、堂兄弟姐妹)是否有上/下肢、腹部或肺部静脉血栓病史。**(脑梗塞、心肌梗死除外)**
- 您或与您有血缘关系的亲属是否曾经被告知存在**血液检测异常(例如抗凝血酶缺陷症,蛋白C或S缺乏,LeidenV因子、凝血酶原G20210A突变,抗磷脂抗体综合征等)**,提示血栓发生的风险增加。

### 6. 请选择以下适用于您的情况:

- 我由于单次步行距离不能超过 9 米而卧床,时间少于 3 天 (**1 分**)。
- 我由于单次步行距离不能超过 9 米而卧床,达 3 天或以上 (**2 分**)。

分数:

Supplementary Fig. S1 Patient-completed Caprini risk score (Chinese questionnaire).

**7. 每条适合于您的情况加 5 分:**

- 在过去的一个月里, 我接受了髋关节或膝关节置换手术。
- 在过去的一个月里, 我曾经有过臀部、骨盆和腿部骨折。
- 在过去的一个月里, 我曾经经历过严重的创伤(例如由于跌倒或车祸造成的**两处及以上骨折**)。
- 在过去的一个月里, 我曾经得过中风(脑血栓或脑出血, 或短暂的脑缺血发作)。
- 分数:

**8. 如果您将接受择期手术, 请选择一个选项。**

- 我**将接受**一个全身或局部麻醉下的**择期手术**, 预计手术时间少于 45 分钟 (**1 分**)。
- 我**将接受**一个全身或局部麻醉下的**择期手术**, 预计手术时间超过 45 分钟 (**2 分**)。
- 分数:

**医疗保健--专业人员填写 :****9. 根据患者的体重指数, 每项陈述增加 1 分:**

- 超重 (BMI > 25)。 BMI=体重(Kg)/身高<sup>2</sup>(m)
- 分数:

**10. 每增加一个风险因素加 1 分: (这些危险因素尚未经过验证研究, 但已在文献中显示与血栓形成有关)**

- 病态肥胖(BMI >40)
- 吸烟(1 个月内)
- 糖尿病患者需要注射胰岛素
- 化疗/放疗(6 个月内)
- 输血(3 个月内)
- 人类免疫缺陷病毒(HIV)
- 分数:

**11. 与患者一起对血栓风险进行重新评估, 包括以下内容, 并根据需要调整评分:**

- 评估患者下肢肿胀情况。包括任何类型的凹陷性水肿。
- 回顾女性患者的产科病史(参见第 3 条“仅针对女性”, 表述 3)。
- 回顾患者血栓形成的家族史。包括一级亲属、二级亲属和三级亲属, 包括浅静脉血栓形成和深静脉血栓形成。

**调整分数:****总分数**

Supplementary Fig. S1 (Continued)
